# Supplementary material for: Disintegrative activation of Pd nanoparticles on carbon nanotubes for catalytic phenol hydrogenation
Source: Royal Society of Chemistry journal article supplement (doi:10.1039/c5cy02165k), 2016-01-01
Supplement: c5cy02165k1.pdf [file c5cy02165k1.pdf]

## **Disintegrative Activation of Pd Nanoparticles on Carbon Nanotube for Catalytic Phenol Hydrogenation**

### **Experimental**

#### **Preparation of Pd/CNT catalyst**

400 mg carbon nanotubes (CNTs) were dispersed into 25 ml water by sonicating for 30 min. Then Pd(NO<sub>3</sub>)<sub>2</sub> solution were added dropwise into the CNTs suspension. After stirring for 8 h at room temperature, water was removed using a rotary evaporator at 60 °C under vacuum. After drying at 80 °C for 8 h in vacuum oven, the powder were reduced at 200 °C for 2 h with H<sub>2</sub>.

The annealed Pd/CNT were obtained by annealing the Pd/CNT at 500 °C for 4 h in Ar atmosphere.

#### **Redisperse annealed Pd/CNT**

##### **1. Redisperse annealed Pd/CNT with HNO<sub>3</sub> vapor**

100-400 mg annealed Pd/CNT were put into a silica cup, which holds some small pores on the cup bottom and wall. Then this cup was placed in a hydrothermal autoclave, which contained some amounts of concentrated HNO<sub>3</sub>. The sealed autoclave were put into a heated oven with 80-120 °C. After 1-6 h, the autoclave were taken out and cooled to room temperature. The Pd/CNT power were washed, dried and reduced with H<sub>2</sub>.

##### **2. Redisperse annealed Pd/CNT with oxygen and nitrogen oxide**

100-400 mg were put into a Teflon-lined stainless-steel reactor which was filled with oxygen/nitrogen oxide. Then the autoclave was heated to a given temperature. After 6 h, the autoclave cooled to room temperature. The Pd/CNT power were washed, dried and reduced with H<sub>2</sub>.

#### **Characterization of catalysts**

Transmission electron microscopy (TEM) images and scanning transmission electron microscopy (STEM) images were obtained by using an FEI Tecnai G2 F20 microscope operated at 200 kV. The X-ray Photoelectron Spectroscopy (XPS) were carried out at

ESCALAB 250 instrument with Al K $\alpha$  X-rays (1489.6 eV, 150 W, 50.0 eV pass energy). The XRD patterns of the Pd/CNT catalysts were collected by using an X-ray diffractometer (D/MAX-2400) using a Cu K $\alpha$  source at a scan rate of 2° • min<sup>-1</sup>.

### Selective Phenol Hydrogenation

The reaction was conducted in a Schlenk flask (20 ml) with a graham condenser. A typical procedure was as follows: phenol (0.5 mmol), catalyst (10 mg), and water 2 ml were placed in a flask. The flask was purged with H<sub>2</sub> to remove the air for 3 times, the reaction was then stirred at 80 °C under 1 bar of H<sub>2</sub>. During the reaction H<sub>2</sub> was continuously supplied to maintain the pressure.

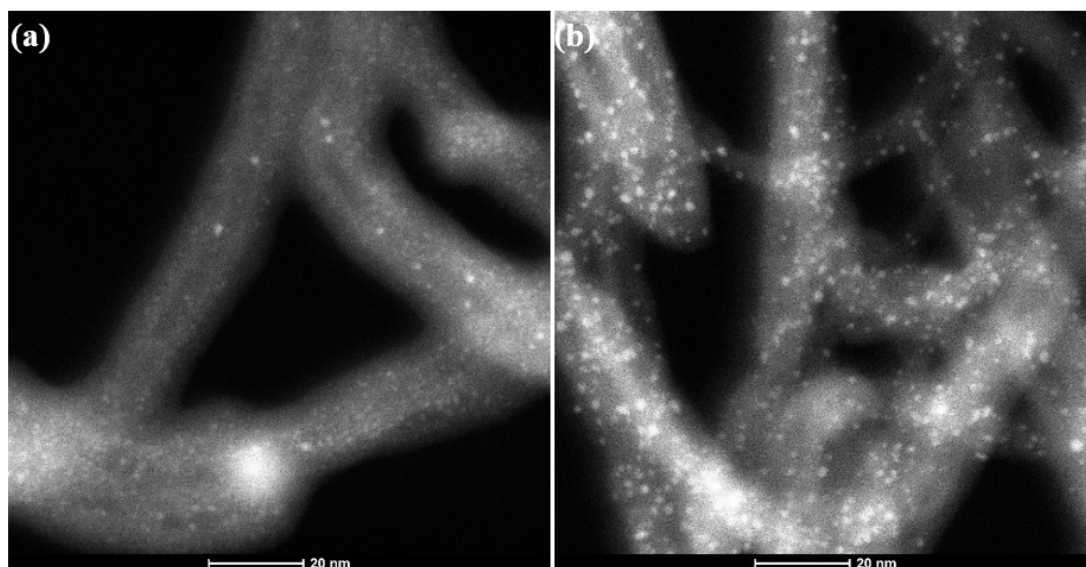

**Figure S1.** STEM images of GO treated Pd/CNT before (a) and after (b) reduction.

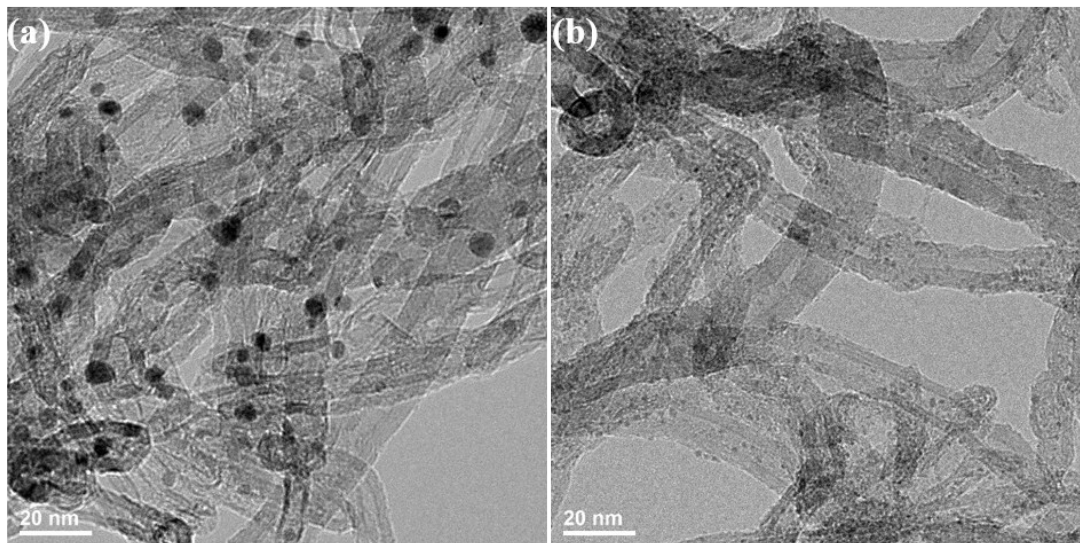

**Figure S2.** TEM images of (a) Annealed Pd/CNT, (b) Pd/CNT-GO at 120 °C for 6 h.

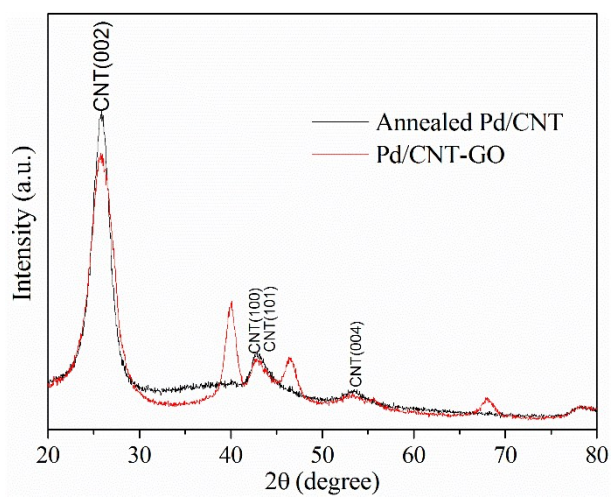

**Figure S3.** XRD patterns of (a) Annealed Pd/CNT, (b) Pd/CNT-GO at 120 °C for 6 h with reduction.

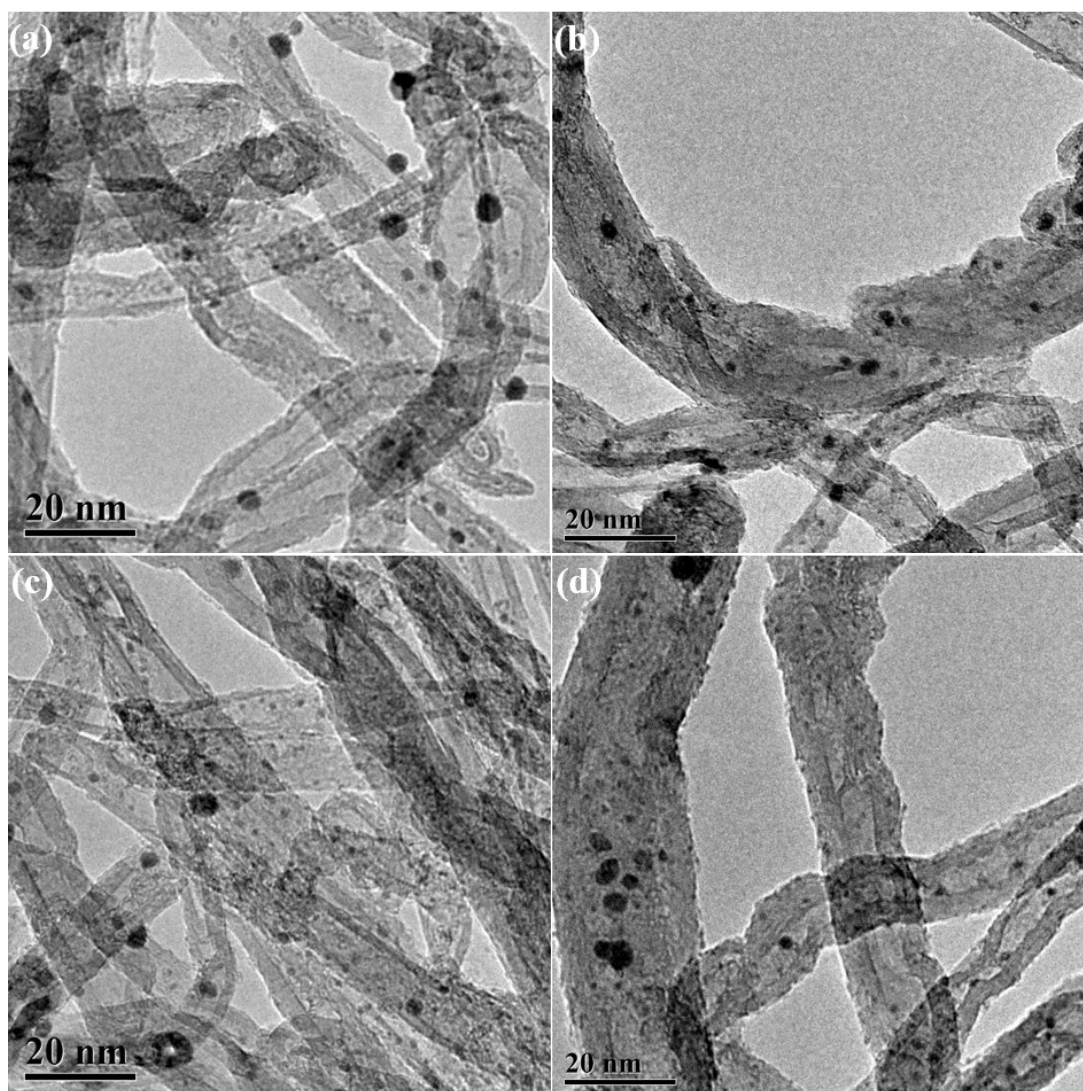

**Figure S4.** TEM images of Pd/CNT after GO treatment at (a) 80 °C for 6 h, (b) 100 °C for 6 h, (c) 120 °C for 1 h, (d) 120 °C for 3 h.

Table 1. The content of surface oxygen and surface atomic ratio of fresh and GO treated Pd/CNT catalysts without reduction, obtained from XPS analysis.

| Catalyst        | Temperatur<br>e/°C | Time/<br>h | Atomic ratio(Pd/C)   | C(At. %) | N(At. %) | O(At. %) | Pd(At. %) |
|-----------------|--------------------|------------|----------------------|----------|----------|----------|-----------|
| Annealed Pd/CNT | -                  | -          | $3.7 \times 10^{-3}$ | 94.87    | 0        | 4.78     | 0.35      |
| Pd/CNT-GO       | 80                 | 6          | $4.7 \times 10^{-3}$ | 93.12    | 0.56     | 5.86     | 0.46      |
|                 | 100                | 6          | $4.9 \times 10^{-3}$ | 92.15    | 0.74     | 6.68     | 0.43      |
|                 | 120                | 1          | $5.3 \times 10^{-3}$ | 92.88    | 0.54     | 6.09     | 0.49      |
|                 | 120                | 3          | $5.5 \times 10^{-3}$ | 90.88    | 0.81     | 7.8      | 0.50      |
|                 | 120                | 6          | $5.7 \times 10^{-3}$ | 89.78    | 0.78     | 8.93     | 0.51      |

Table 2. The content of surface oxygen and surface atomic ratio of fresh and GO treated Pd/CNT catalysts without reduction, obtained from XPS analysis.

| Gas                     | P <sub>Gas</sub> (MPa) | Temperature/°C | Time/h | C(At.%) | N(At.%) | O(At. %) | Pd(At. %) |
|-------------------------|------------------------|----------------|--------|---------|---------|----------|-----------|
| 40% O <sub>2</sub>      | 1                      | 120            | 6      | 94.02   | 1.07    | 4.58     | 0.34      |
| 40% O <sub>2</sub>      | 1                      | 200            | 6      | 94.21   | 0.39    | 4.97     | 0.44      |
| 5% NO <sub>2</sub>      | 0.6                    | 120            | 6      | 92.77   | 0.62    | 5.66     | 0.53      |
| 5% NO <sub>2</sub> flow | 0.1                    | 120            | 6      | 94.11   | 0.48    | .91      | 0.51      |

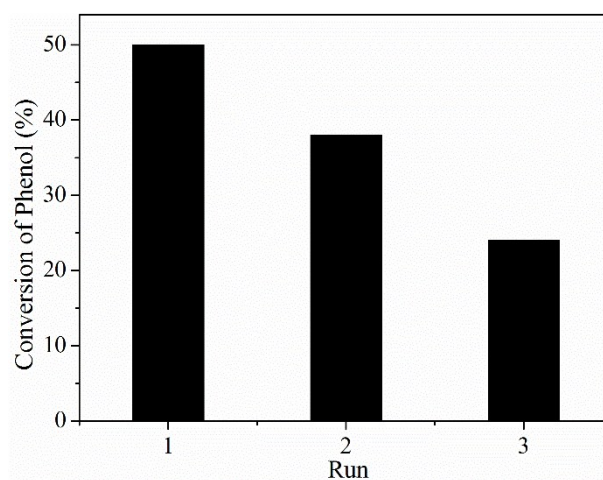

Figure S5. The recyclability of the re-dispersed catalyst.

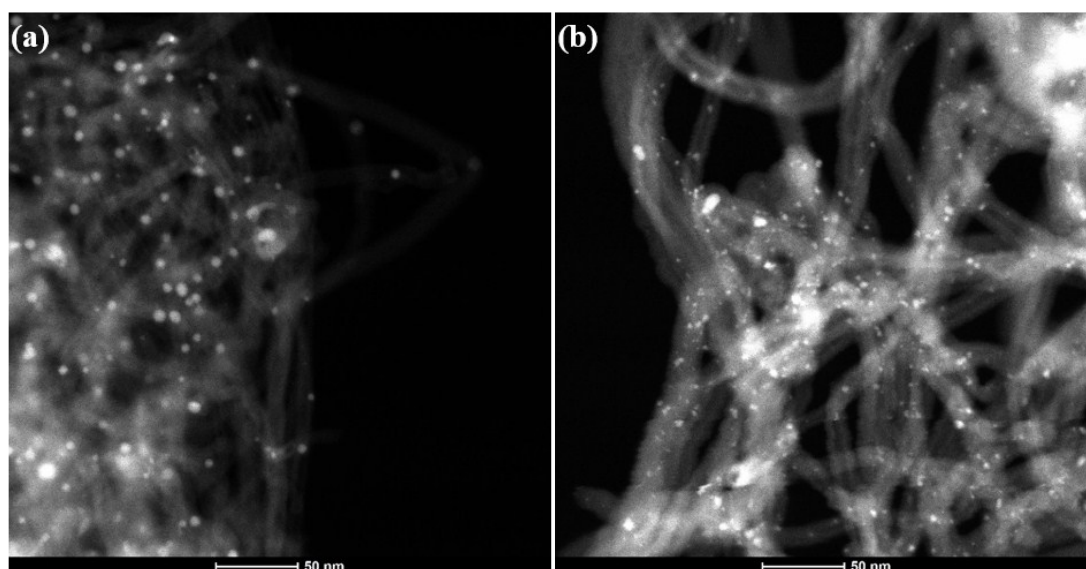

Figure S6. STEM images of Pd/CNT after GO treatment with 40% O<sub>2</sub> under 1 MPa (a) at 120 °C for 6 h (b) at 200 °C for 6 h without reduction.

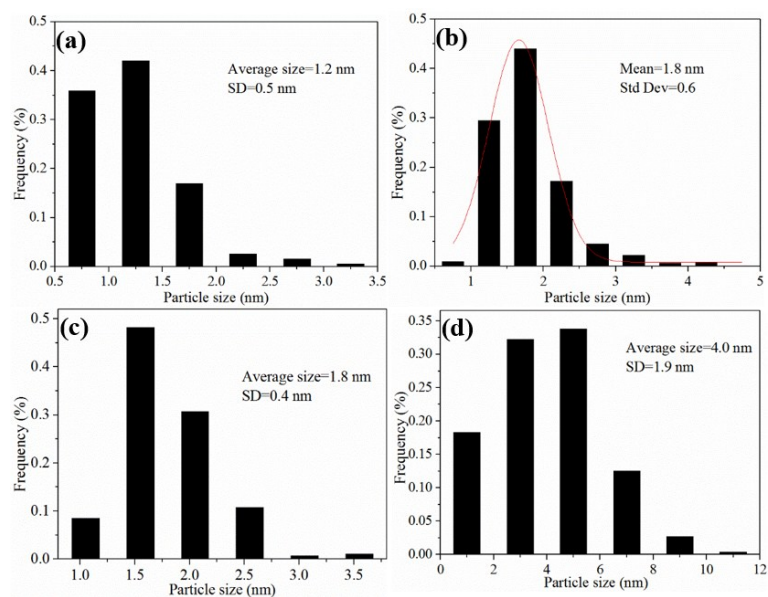

**Figure S7.** PSD patterns of Pd NPs of (a) 5% NO<sub>2</sub>/He(0.6 MPa) without reduction, (b) with reduction, (c) 5% NO<sub>2</sub>/He flow (ambient pressure) without reduction, (d) with reduction.

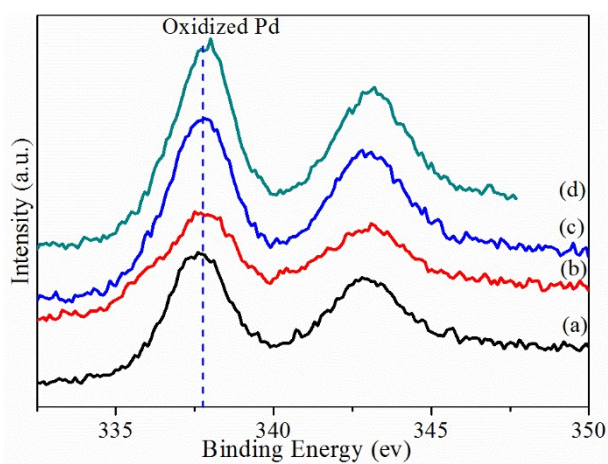

**Figure S8.** XPS Pd 3d spectra recorded on Pd/CNT after GO treatment at (a) 80 °C for 6 h, (b) 100 °C for 6 h, (c) 120 °C for 1 h, (d) 120 °C for 3 h without reduction.
